# Supplementary material
Source: publisher site journal article supplement (http://spandidos-publications.com/5395/downloadSupplementary)

Figure S1. Funnel plot of publication bias of clinical response to VDZ induction therapy in IBD. VDZ, vedolizumab; IBD, irritable bowel disease; RR, risk ratio.

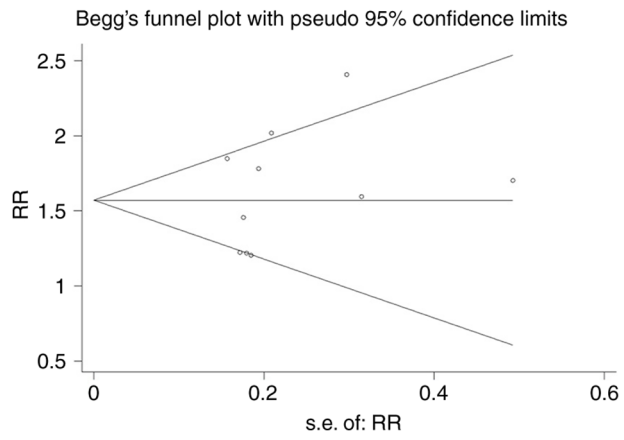

Figure S2. Random-effects meta-analysis of studies that VDZ treatment of IBD corticosteroid-free remission. VDZ, vedolizumab; IBD, irritable bowel disease; RR, risk ratio; CI, confidence interval.

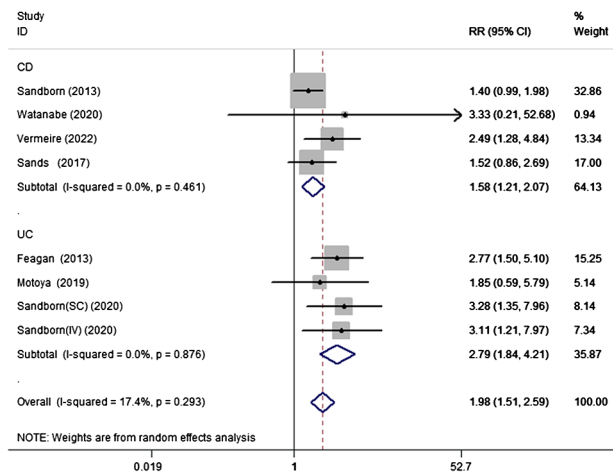

Figure S3. Random-effects meta-analysis of studies that VDZ treatment of IBD mucosal healing. VDZ, vedolizumab; IBD, irritable bowel disease; RR, risk ratio; CI, confidence interval.

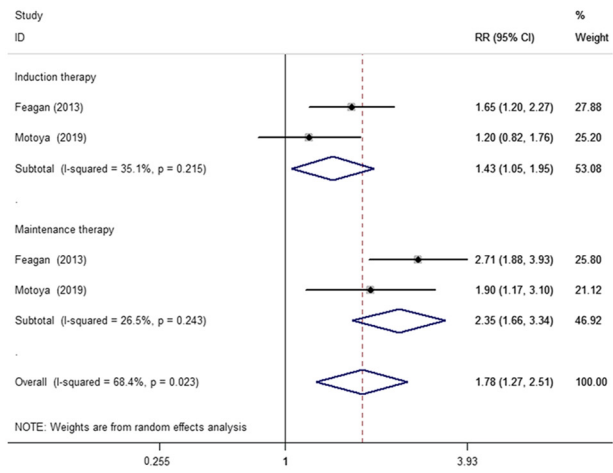

Supplement: Supplementary file 1 [file downloadSupplementary]
